# Supplementary material for: Serological profiles of pan-coronavirus-specific responses in COVID-19 patients using a multiplexed electro-chemiluminescence-based testing platform
Source: bioRxiv or medRxiv preprint supplement (doi:10.1101/2021.03.23.21253460), 2021-03-26
Supplement: Supplementary file [file media-2.pdf]

***SI Table:*** Age and sex of Control Subjects

| <b>Subject ID</b> | <b>Age Range (y.o.) [Sex]</b> |
|-------------------|-------------------------------|
| PG3-0061          | 60-69 [M]                     |
| PG3-0062          | 30-39 [M]                     |
| PG3-0064          | 40-49 [F]                     |
| PG3-0066          | 50-59 [M]                     |
| PG3-0067          | 30-39 [M]                     |
| PG3-0068          | 40-49 [M]                     |
| PG3-0069          | 30-39 [F]                     |
| PG3-0070          | 40-49 [M]                     |
