# Supplementary material for: Serological profiles of pan-coronavirus-specific responses in COVID-19 patients using a multiplexed electro-chemiluminescence-based testing platform
Source: bioRxiv or medRxiv preprint supplement (doi:10.1101/2021.03.23.21253460), 2021-03-26
Supplement: Supplementary file [file media-3.pdf]

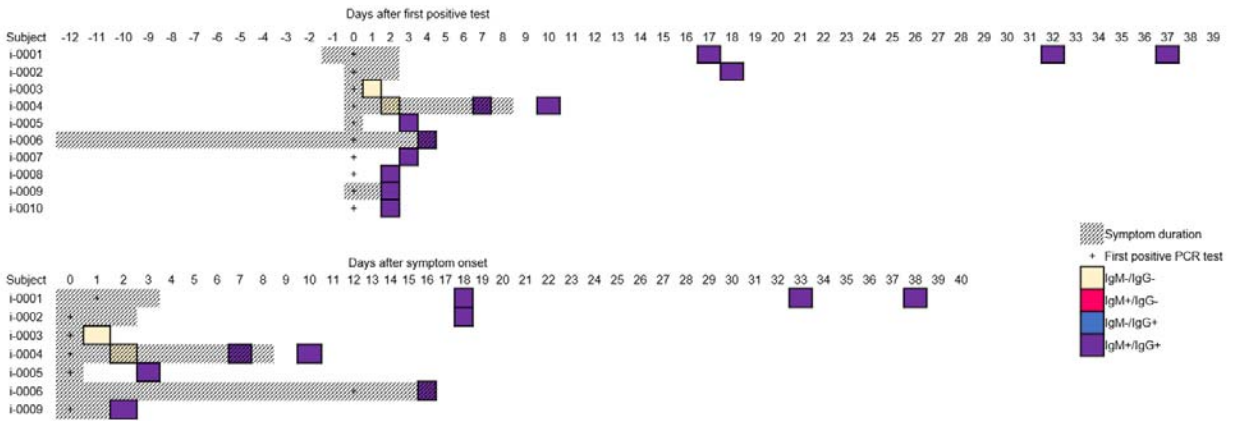

**S2 Fig: IgM and IgG seropositivity with respect to disease progression.** Seropositivity with respect to disease progression is shown for time after first positive PCR test (top) and time after symptom onset (bottom), with time of first positive test ('+'), symptom duration (shaded), and seropositivity results (seronegative, tan; IgM+/IgG-, magenta; IgM-/IgG+, blue; IgM+/IgG+, purple).
